# Supplementary material
Source: MDPI journal article supplement (https://www.mdpi.com/2078-1547/5/1/1)
Supplement: s1 [file s1]

## Sheet: CountryGroupEnergyConsumptionTh
ThermalEquivalentTeraJoules	Before1950	1950	1951	1952	1953	1954	1955	1956	1957	1958	1959	1960	1961	1962	1963	1964	1965	1966	1967	1968	1969	1970	1971	1972	1973	1974	1975	1976	1977	1978	1979	1980	1981	1982	1983	1984	1985	1986	1987	1988	1989	1990	1991	1992	1993	1994	1995	1996	1997
Coal	Before1950	1950	1951	1952	1953	1954	1955	1956	1957	1958	1959	1960	1961	1962	1963	1964	1965	1966	1967	1968	1969	1970	1971	1972	1973	1974	1975	1976	1977	1978	1979	1980	1981	1982	1983	1984	1985	1986	1987	1988	1989	1990	1991	1992	1993	1994	1995	1996	1997
ChinaGroup	35465228	1255824	1614392	2025423	2102794	2525199	2988724	3350050	3991918	8131172	11083646	11953567	8500049	6852653	6790902	6758016	7345153	7951027	6670038	7189218	8597864	11215076	12669113	12993487	13267421	13187707	15253440	15342137	17106197	19112701	19619058	19223952	19266805	20992402	22575519	24934173	27566755	28322580	29518850	31412059	33706043	34516089	34749437	35637580	36934558	39346089	42821744	43891779	43044661
IndiaGroup	35852738	964929	1009626	1073068	1083320	1105727	1152503	1184458	1314218	1368130	1422085	1583447	1691663	1850973	2008953	1905708	2060253	2092596	2111708	2201551	2204292	2281640	2221383	2333719	2399417	2585769	2924527	3075493	3054429	3101109	3174948	3365348	3789788	4017651	4182951	4488287	4691070	5142586	5562569	5979458	6281872	6494554	7219880	7460567	7826007	8172277	8580040	9208714	9672030
NigeriaGroup	19147232	863781	903931	994768	1000777	1039018	1173676	1229245	1276304	1308400	1314074	1332450	1339037	1362500	1391832	1493812	1634542	1583435	1681448	1725648	1723342	1752092	1852801	1871615	1970996	2044046	2135133	2235806	2344282	2346555	2543139	2681438	3139211	3310791	3442138	3782780	3909077	4035005	4107096	4251301	4100121	3852366	4035049	3796894	4199173	4325257	4487052	4461784	4728426
BrazilGroup	24511294	253625	289537	283201	272560	281302	284188	287428	277600	280850	280327	300663	305972	308279	318129	324534	327423	338076	366026	373986	399539	379208	402290	405369	435280	505209	531455	552420	634593	642482	733829	637458	626688	642322	707002	838132	876143	860586	880666	887028	958582	925122	859835	938833	827177	951226	1074515	1065764	1139079
EthiopiaEgyptGroup	9235933	138530	144160	143827	160693	161817	156396	164669	183706	183948	171055	159926	157739	161874	177060	201725	203915	222965	232951	236086	231126	227388	237640	255600	259738	284791	321144	324058	331651	337778	416577	413652	475801	561010	656576	767970	952724	1073261	1133644	1022673	1208250	1203714	1195685	1294563	1257287	1390747	1431957	1553915	1703622
IndonesiaGroup	27782171	789339	819825	904827	852680	916303	938674	957399	959152	1004333	1072384	1178351	1212178	1276982	1343892	1409458	1491477	1553581	1596802	1571007	1603991	1700324	1576643	1777600	1767206	1924399	2101759	2148137	2301387	2239057	2435130	2377710	2792520	3017133	2972936	2954511	3279804	3649379	4032894	3602295	4010189	4098772	4273616	4249684	4342263	4475224	4865501	5304950	5585843
EUGroup	1305678963	27206197	29800585	30777482	31181906	32525211	34836402	36792422	38146134	38093956	37469610	37905136	38076033	39063884	40001181	40960335	40858223	40168973	39345269	39141289	39465744	40032826	40684004	39879901	40199066	40240028	41670284	42244558	42560745	42857009	43970457	46050923	44121721	45241081	44620975	43339347	48131091	49083021	49105670	49030304	47590671	42877287	38893411	38794719	34860821	32290328	31532891	30515709	29292592
USAGroup	807365113	15219632	14747607	13122999	12952675	11138184	12406492	13011190	12399860	10687879	11039378	11089165	10703679	11100712	11879661	12667829	13274224	13807227	14261742	14013900	14244461	15033133	13967898	15104962	14919614	15019169	16132731	17006292	17559262	15938749	17950492	18053389	17267053	17834530	17158135	19866653	18892408	19145146	19989687	20234469	20684405	21658321	20525295	20761046	19886154	22026952	21237159	21927587	22848111
Japan	47153498	1156373	1347046	1375887	1516370	1370103	1336985	1484027	1726520	1611123	1551469	1760335	1941668	1958383	1862817	1888276	1958253	2081178	2141149	2318418	2517943	2635054	2355432	2267840	2322612	2472209	2375976	2317987	2317137	2084356	2231256	2525265	2809414	2832221	2686956	3042804	3217637	3117147	3045978	3294843	3272226	3276312	3440306	3419287	3474999	3606303	3776609	3888935	3996638
Oil	Before1950	1950	1951	1952	1953	1954	1955	1956	1957	1958	1959	1960	1961	1962	1963	1964	1965	1966	1967	1968	1969	1970	1971	1972	1973	1974	1975	1976	1977	1978	1979	1980	1981	1982	1983	1984	1985	1986	1987	1988	1989	1990	1991	1992	1993	1994	1995	1996	1997
ChinaGroup	1787024	42645	56650	58147	78234	115869	146291	203409	225091	276946	388090	448462	453176	466881	496933	568139	705976	876512	896125	1039661	1390724	1832120	2277822	2585917	2993385	3370585	3692654	4424880	4778620	5272526	5260456	5338792	5024646	4984238	5166333	5186459	5203457	5843762	6118685	6530213	6912115	6936684	7274733	7898872	8873607	8807971	9469797	10092639	11103140
IndiaGroup	5790190	87301	327367	261160	270526	267027	396018	519302	648360	690717	708672	904726	913447	981789	1063058	1153311	1249065	1385728	1447661	1780947	1823147	1855650	2058407	2132376	2418858	2548279	2599171	2723521	2931571	3233558	3432462	3165532	3471258	3801367	3739097	3620939	4446961	4197733	4376167	4760733	5215402	6002859	6204640	6349166	6435838	7009954	7055048	7758795	7546806
NigeriaGroup	1477003	326697	375432	387161	402070	456248	489646	568420	650245	545615	537515	613471	674962	708299	744143	886602	966857	1070314	1272989	1427986	1485862	1750572	2172464	1954908	2248210	2167612	2263042	2248723	2335023	2519683	2303772	2617414	2856667	2693887	2848802	2938605	3013967	2932552	2429374	2920448	3084544	2987911	3194918	3165163	3045905	3069798	2828514	3079236	3048396
BrazilGroup	19708644	1928679	2233992	2290677	2375307	2570950	2827677	3120687	3511194	3390771	3663948	3744697	3968308	4222451	4178075	4459140	4688057	4751333	4996380	5461088	5681654	6139307	6716652	6753981	7780232	8053558	8074971	8693458	8892450	9502226	10302164	10901636	11163367	10903710	10271432	10657214	10355681	10658328	11154960	11381725	11687194	12056762	11938996	12846933	13111854	13348974	13247887	13879291	14101348
EthiopiaEgyptGroup	5028855	743213	957762	1027498	1084588	1311472	1481753	1512283	1547256	1673569	1809794	2022140	2178215	2351888	2499345	2741171	2977253	3381994	3222189	3508786	3537581	3827520	4632754	5210233	5878028	6317020	5758523	6879198	7359868	7015853	7943352	5636826	6018508	6226597	6687017	6522393	6657937	6876986	7155433	7920115	7800404	8313978	8134645	9005703	9513975	10217424	10399223	10512670	10813431
IndonesiaGroup	8131327	506908	582335	690403	709911	817279	1019964	1084176	1175458	1218539	1248450	1283615	1469988	1499171	1659873	1878122	2045070	2315858	2715544	3101948	3481474	3877136	3900209	4079476	4613539	4383777	4497614	4822625	5236383	5305081	5842949	6317425	6251493	5792978	6123298	6078771	6248708	6360609	6555372	6932586	7726393	10072340	10651887	11747906	12971820	13520945	14194390	14542847	15330783
EUGroup	55036412	4712058	5553550	6058070	6615945	7561132	8867824	10022652	11069532	12170688	13498303	15364762	16972174	19285849	21800692	24440822	26955756	29574141	31939947	35113146	38514710	42915022	45122436	47927920	51755177	51600898	48952596	52352555	52684297	54504580	56578079	54707477	50905585	49872986	48803756	48998811	48914082	50424043	50330155	50675797	50892881	53936345	49918993	47597384	43850429	41530389	41283150	40913121	41224121
USAGroup	233330610	15386565	17146408	17783692	18682438	18598813	20346958	21793569	21709925	21376252	22696406	23012402	23692648	24437097	25511074	26267306	27453127	28985559	30001772	31889019	33038538	34588281	35533214	37657881	40505953	39191693	38069596	40381846	44063300	43654183	43185086	40078753	37317949	34285095	34193066	35538534	34485390	36414248	37543225	38449257	38967955	38808934	37583138	37717316	40559697	41469652	40662671	40839757	41977598
Japan	2647524	94100	174046	224450	364486	407585	483233	606031	812017	773568	1005540	1451687	1905943	2237250	2817486	3335737	3730366	4242964	5148546	6011738	7129348	8836961	9727732	10766226	12206446	11716708	10925652	11369139	11871867	11642199	12263481	10923840	9755209	9182883	9239268	9602300	9097740	9301540	9434780	10034286	10708914	11296154	11030625	11571433	11383412	12161729	11979445	12146690	11874847
NaturalGas	Before1950	1950	1951	1952	1953	1954	1955	1956	1957	1958	1959	1960	1961	1962	1963	1964	1965	1966	1967	1968	1969	1970	1971	1972	1973	1974	1975	1976	1977	1978	1979	1980	1981	1982	1983	1984	1985	1986	1987	1988	1989	1990	1991	1992	1993	1994	1995	1996	1997
ChinaGroup	33424	1718	1183	1302	1137	1544	1734	2127	3879	5348	12291	41457	58698	48647	41710	47683	54570	68972	76890	82220	111048	147591	188055	237851	289825	353288	404329	464789	547427	608218	636009	629126	558673	518956	531867	548213	554537	581244	586825	607710	638854	680257	748202	736227	853412	999341	1036209	1143904	1203937
IndiaGroup	0	0	0	0	0	0	247942	276044	204257	229524	263132	294616	337241	369597	416540	480589	641480	838430	1050252	1275409	1438792	1549067	1542172	1564558	1821315	1927407	1746352	1977077	2267940	2254432	1740101	1184273	1164987	1532963	1655090	1913701	2029172	2190831	2411374	2686011	2954505	3339687	3672536	3807219	4343120	4701723	5001465	5257051	5211934
NigeriaGroup	0	0	0	0	0	0	0	0	0	0	272	272	272	351	24780	40540	104615	112690	103479	58061	163651	353660	553868	722007	922413	1175943	860607	969104	933021	888254	1244848	1047703	922840	827402	713179	771381	873498	865554	794940	917560	306024	373468	345332	359861	380010	369796	384678	406696	430791
BrazilGroup	2020489	788592	978229	1061253	1055642	1110981	1268315	1422130	1665778	1791311	1942318	1994280	2105690	2315594	2484313	2750119	2841033	3013986	3315419	3365051	3510041	3780718	3793932	3785531	4004401	3982966	3705375	3776447	3786433	3935881	4315866	4448454	4625026	4720059	4790653	4994164	5036348	5178810	5323513	5555878	5701405	5060288	5244441	4855648	5132337	5540832	5684134	6109403	6514598
EthiopiaEgyptGroup	0	46	92	154	292	498	13414	14594	10889	8745	13463	60921	73103	92441	224076	649369	879669	949925	1894756	2231948	2859035	3295355	3783564	4059530	4997362	4781250	4429522	5255158	5364119	6172734	6355563	6360092	6436668	6169859	6083281	6560658	6518769	7337164	7970302	8410063	8828214	9299769	9447245	9892976	10639537	11115967	10522982	11281243	11198110
IndonesiaGroup	518062	31622	38035	49282	61218	69617	83181	88645	93008	90592	96101	104856	109085	115051	118146	114277	132247	132162	133729	137537	122725	362407	430702	565241	611153	675211	712021	863128	1159544	1363154	1362285	1297198	1452066	1587949	1738322	1800510	2055957	2174374	2384938	2725776	2819087	3107547	3535178	3977505	4428707	4808120	5543705	5778014	6109208
EUGroup	3394387	477290	554333	625169	722625	771829	914006	1104645	1428783	1859646	2295366	2792948	3445775	4158307	4945431	5833495	6706801	7540722	8440077	9498671	10614973	11212993	13072901	14633768	16010416	17726322	19188178	20881907	21881790	23211316	24765081	25553364	26494737	26933901	28509899	30384077	32740886	32074593	34985088	36072309	37589180	38418745	38569870	40273590	40008888	38552307	39247684	41311841	39199993
USAGroup	86683074	9672383	11093327	11700763	12253194	12539383	13517303	14268876	14956221	15462130	16224003	17249615	17848775	18855315	20030000	21010000	21670000	22760000	24250000	25630000	27470000	28630000	29210000	29640000	29890000	28480000	26600000	26500000	26800000	27030000	28030000	27700000	27300000	25900000	24220000	26040000	25530000	24800000	26230000	27740000	27980000	29120000	29490000	30260000	31580000	32260000	32750000	33420000	33680000
Japan	50750	2744	3303	3617	4413	5610	6967	9521	12946	18845	23798	32527	41579	54039	74667	81383	73363	75210	79436	85919	95926	157636	166400	165563	220365	291153	352334	423375	505694	705266	834614	977532	990647	1010000	1090000	1460000	1570000	1660000	1680000	1760000	1890000	2060000	2170000	2220000	2280000	2410000	2480000	2630000	2740000
Nuclear	Before1950	1950	1951	1952	1953	1954	1955	1956	1957	1958	1959	1960	1961	1962	1963	1964	1965	1966	1967	1968	1969	1970	1971	1972	1973	1974	1975	1976	1977	1978	1979	1980	1981	1982	1983	1984	1985	1986	1987	1988	1989	1990	1991	1992	1993	1994	1995	1996	1997
ChinaGroup	0	0	0	0	0	0	0	0	0	0	0	0	0	0	0	0	0	0	0	0	0	0	0	0	0	0	0	0	938	25285	59959	77675	101065	123954	179091	232948	272151	255231	313844	290378	267878	311362	334326	325374	349143	463396	456149	493466	480193
IndiaGroup	0	0	0	0	0	0	0	0	0	0	0	0	0	0	0	0	0	0	0	0	12685	22898	11719	11719	25579	25247	30619	36587	25512	28430	28260	28450	30041	20890	35754	41674	50476	51651	52456	57514	44100	60954	55980	67680	56653	58215	80460	90512	98801
NigeriaGroup	0	0	0	0	0	0	0	0	0	0	0	0	0	0	0	0	0	0	0	0	0	0	0	0	0	0	0	0	0	0	0	0	0	0	0	37184	37184	37184	58737	99474	105158	79579	88105	87992	68732	91866	107062	111553	119814
BrazilGroup	0	0	0	0	0	0	0	0	0	0	0	0	0	0	0	0	0	0	0	0	483	426	398	692	436	10061	24082	24537	15508	27436	25503	22168	26678	17716	32258	43967	86656	55478	70465	60688	68599	117995	127468	120884	125527	135616	142048	168310	204499
EthiopiaEgyptGroup	0	0	0	0	0	0	0	0	0	0	0	0	0	0	0	0	0	0	0	0	0	0	0	0	0	0	0	0	0	0	0	0	0	0	0	0	0	0	0	0	0	0	0	0	0	0	0	0	0
IndonesiaGroup	0	0	0	0	0	0	0	0	0	0	0	0	0	0	0	0	0	0	0	0	0	0	0	0	0	0	0	0	673	22017	29861	32940	27445	35782	84932	111714	158637	268209	372448	379904	448721	501035	533473	535547	550781	555641	635012	700333	730288
EUGroup	0	0	0	0	0	0	0	549	3875	2927	11766	20928	25256	39647	73932	113486	197811	258045	299720	338447	393726	428665	484825	637427	698504	818735	1099905	1281458	1853486	2156312	2469943	2847496	3556828	4012427	4816724	6162668	7397477	7837968	8494094	9111826	9599117	9657484	9826352	10174131	10235415	9932200	10197237	10816513	10916402
USAGroup	0	0	0	0	0	0	0	0	95	1563	1781	4907	16029	21713	31253	33007	35782	53943	74236	126985	136629	215744	398766	576284	925920	1211116	1746606	1966150	2628691	2916711	2754559	2743711	2966390	3013522	3247067	3603174	4208324	4597626	5045030	5777432	5772079	6157373	6607942	6625563	6671709	7088997	7306541	7654538	7094757
Japan	0	0	0	0	0	0	0	0	0	0	0	0	0	0	0	0	237	5533	5959	9891	10251	43399	75884	89811	91961	186622	238026	322854	299927	561922	666881	782441	831979	972767	1082757	1271975	1511792	1594459	1778760	1692559	1732443	1916261	2022253	2115085	2361373	2549615	2759248	2862947	3023782
WaterDriven	Before1950	1950	1951	1952	1953	1954	1955	1956	1957	1958	1959	1960	1961	1962	1963	1964	1965	1966	1967	1968	1969	1970	1971	1972	1973	1974	1975	1976	1977	1978	1979	1980	1981	1982	1983	1984	1985	1986	1987	1988	1989	1990	1991	1992	1993	1994	1995	1996	1997
ChinaGroup	166586	16844	33755	35915	37145	50637	63673	92018	122760	121822	127525	168300	182283	206157	201136	223190	227236	248788	253270	251658	287546	330300	376967	420972	519148	569417	657104	633619	655323	654594	712393	792019	884283	986978	1111718	1119874	1206246	1240569	1290666	1390889	1485747	1578940	1538052	1561481	1729146	1899493	2107497	2079588	2145998
IndiaGroup	191707	25768	29388	29529	31529	35442	40898	47379	54986	63559	75922	84497	105886	130433	153266	164550	174004	190562	214503	241911	271118	293714	335833	340968	357650	353557	409909	441104	469639	601825	587833	604924	643880	638650	667581	731377	700437	743249	703886	833836	882843	963644	996641	991847	1030812	1113869	1048045	1014716	1043092
NigeriaGroup	11886	9189	10040	10677	14238	17431	19901	23704	33281	39015	43862	54683	67443	77125	79560	85462	93981	101016	116296	132602	152089	168687	180798	211101	227729	256622	269517	303538	340741	355804	415941	455740	380784	372989	363297	316923	343309	364553	349643	359181	376958	378352	406029	418634	408689	424488	433521	452341	479321
BrazilGroup	1433209	119538	128670	146254	150175	172033	201193	233109	254683	293890	304492	322862	336222	365307	384291	423806	477850	532206	568148	610031	661075	763390	826020	933299	1032139	1165389	1243183	1378352	1535978	1648752	1877854	2071088	2183580	2325655	2496144	2738187	2974679	3150435	3312578	3474020	3586916	3720503	3929265	4057068	4373859	4589855	4790937	4970407	5214365
EthiopiaEgyptGroup	5492	4888	7049	6784	7050	11662	12400	15289	16559	20605	21390	26280	35837	38045	50457	50750	59750	60536	63228	84780	100289	104542	105660	113930	105385	128244	159405	201713	220489	241304	255204	268211	282856	298337	258033	276612	251433	243019	313496	440962	334051	371540	357736	394067	483137	464285	514933	578272	577857
IndonesiaGroup	624784	50381	54692	59059	67282	72766	79030	90255	100590	104883	115719	127221	138827	153814	176912	206223	213015	229377	243975	251896	262184	291494	335719	346416	352658	379575	431715	418652	388999	411631	484275	481681	541664	534955	562077	617650	648313	704927	704074	747910	810130	826771	826494	824246	882491	930340	992780	1004504	971303
EUGroup	18523313	1184090	1357237	1449493	1514759	1623553	1769275	1892342	2057598	2336352	2397494	2723472	2889466	3051363	3278960	3254889	3644332	4016127	4002746	4249722	4306053	4631929	4752960	4864999	4985899	5165157	5154218	4906778	5790808	5988235	6292152	6102904	6215664	6054806	6281197	6544583	6637512	6445268	6851463	7164425	6580359	6734094	6758445	7104250	7267099	7398869	7403381	7050788	7146756
USAGroup	22617433	1461136	1552879	1647976	1676937	1711260	1827900	1967210	2057513	2223815	2261994	2422175	2462315	2618942	2588846	2785282	2979341	3109177	3393304	3424604	3823333	3867063	4086939	4337100	4468945	4903447	4823072	4771004	4265877	4960327	5035387	5082480	5066715	5468798	5744642	5856642	5687583	5869100	5547089	5214932	5470834	5674775	5979875	5704362	6023824	6122521	6660436	7090949	6864972
Japan	5360448	362444	355509	382055	395640	433791	459919	498439	537035	575735	584545	554031	643803	590902	655276	652964	712431	756900	662476	709247	730194	761049	824107	835304	681082	806135	817427	840865	728024	714524	816101	882787	868898	807925	847327	739308	847014	828398	779106	921240	939827	924405	1017171	865923	1016024	736323	894212	882057	986874
WindAndSolarElectric	Before1950	1950	1951	1952	1953	1954	1955	1956	1957	1958	1959	1960	1961	1962	1963	1964	1965	1966	1967	1968	1969	1970	1971	1972	1973	1974	1975	1976	1977	1978	1979	1980	1981	1982	1983	1984	1985	1986	1987	1988	1989	1990	1991	1992	1993	1994	1995	1996	1997
ChinaGroup	0	0	0	0	0	0	0	0	0	0	0	0	0	0	0	0	0	0	0	0	0	0	0	0	0	0	0	0	0	0	0	0	0	0	0	0	0	0	0	0	0	19	19	28	38	47	66	85	104
IndiaGroup	0	0	0	0	0	0	0	0	0	0	0	0	0	0	0	0	0	0	0	0	0	0	0	0	0	0	0	0	0	0	0	0	0	0	0	0	0	19	28	57	57	287	1070	838	898	1812	4712	8378	9417
NigeriaGroup	0	0	0	0	0	0	0	0	0	0	0	0	0	0	0	0	0	0	0	0	0	0	0	0	0	0	0	0	0	0	0	0	0	0	0	0	0	0	0	0	0	0	0	0	19	51	60	67	68
BrazilGroup	0	0	0	0	0	0	0	0	0	0	0	0	0	0	0	0	0	0	0	0	0	0	0	0	0	0	0	0	0	0	0	0	0	0	0	0	0	0	0	0	0	9	19	28	57	85	104	228	352
EthiopiaEgyptGroup	0	0	0	0	0	0	0	0	0	0	0	0	0	0	0	0	0	0	0	0	0	0	0	0	0	0	0	0	0	0	0	0	0	0	0	0	0	1	1	1	1	1	1	1	1	1	2	2	11
IndonesiaGroup	0	0	0	0	0	0	0	0	0	0	0	0	0	0	0	0	0	0	0	0	0	0	0	0	0	0	0	0	0	0	0	0	0	0	0	0	6821	7929	0	0	0	9	9	128	142	161	181	370	503
EUGroup	0	0	0	0	0	0	0	0	0	0	0	0	0	0	0	0	0	0	0	0	0	0	0	0	0	0	0	0	0	28	57	199	199	275	483	776	1164	2548	3514	5731	8457	12285	17532	24332	22998	33882	39463	46964	70750
USAGroup	0	0	0	0	0	0	0	0	0	0	0	0	0	0	0	0	0	0	0	0	0	0	0	0	0	0	0	0	0	0	0	0	0	0	28	116	10484	18076	27961	24026	24381	32486	33383	31999	33882	38185	35580	37886	36323
Japan	0	0	0	0	0	0	0	0	0	0	0	0	0	0	0	0	0	0	0	0	0	0	0	0	0	0	0	0	0	0	0	0	0	0	0	0	0	9	18	18	18	9	9	189	246	322	445	616	918
Biofuels	Before1950	1950	1951	1952	1953	1954	1955	1956	1957	1958	1959	1960	1961	1962	1963	1964	1965	1966	1967	1968	1969	1970	1971	1972	1973	1974	1975	1976	1977	1978	1979	1980	1981	1982	1983	1984	1985	1986	1987	1988	1989	1990	1991	1992	1993	1994	1995	1996	1997
ChinaGroup	101	0	0	0	0	0	0	0	0	0	0	0	0	0	0	0	0	0	0	0	0	0	0	0	0	0	0	0	0	0	0	0	0	0	0	0	0	0	0	0	0	0	0	0	0	0	0	0	0
IndiaGroup	1350	0	0	0	0	0	0	0	0	0	0	0	0	0	0	0	0	0	0	0	0	0	0	0	0	0	0	0	0	0	0	0	0	0	0	0	0	0	0	0	0	0	0	0	0	0	0	0	0
NigeriaGroup	56	0	0	0	0	0	0	0	0	0	0	0	0	0	0	0	0	0	0	0	0	0	0	0	0	0	0	0	0	0	0	0	0	0	0	0	0	0	0	0	0	0	0	0	0	273	273	273	409
BrazilGroup	25684	0	0	0	0	0	0	0	0	0	0	0	0	0	0	0	0	0	0	0	0	13377	13297	14605	13937	13190	12416	15219	31159	50169	63306	80981	93396	122632	173951	202494	253330	219662	270846	253650	260646	254452	282566	258349	249645	299011	304234	335912	368562
EthiopiaEgyptGroup	7	0	0	0	0	0	0	0	0	0	0	0	0	0	0	0	0	0	0	0	0	0	0	0	0	0	0	0	0	0	53	53	53	53	53	53	53	0	0	0	0	0	0	0	0	0	0	0	0
IndonesiaGroup	20886	0	0	0	0	0	0	0	0	0	0	0	0	0	0	0	0	0	0	0	0	0	0	0	0	0	0	0	0	0	0	0	0	0	0	0	0	0	0	0	0	0	0	0	0	0	0	0	0
EUGroup	214582	0	0	0	0	0	0	0	0	0	0	0	0	0	0	0	0	0	0	0	0	0	0	0	0	0	0	0	0	0	0	0	0	0	0	0	0	0	0	0	0	0	0	139	522	3861	7343	10680	13007
USAGroup	2554	0	0	0	0	0	0	0	0	0	0	0	0	0	0	0	0	0	0	0	0	0	0	0	0	0	0	0	0	0	0	0	0	0	0	0	0	0	0	0	0	0	0	0	0	114660	120773	86361	114604
Japan	38516	0	0	0	0	0	0	0	0	0	0	0	0	0	0	0	0	0	0	0	0	0	0	0	0	0	0	0	0	0	0	0	0	0	0	0	0	0	0	0	0	0	0	0	0	0	0	0	0
[truncated: 15 more columns]
